# Supplementary material
Source: publisher figshare collection journal article supplement (https://acs.figshare.com/ndownloader/files/4275106)
Supplement: Supplementary file 1 [file 4275106]

 
data_x11029 
  
_audit_creation_method            SHELXL-97 
_chemical_name_systematic 
; 
 ? 
; 
_chemical_name_common             ? 
_chemical_melting_point           ? 
_chemical_formula_moiety          ? 
_chemical_formula_sum 
 'C31 H36 N2 O4' 
_chemical_formula_weight          500.62 
_chemical_absolute_configuration  ad
  
loop_ 
 _atom_type_symbol 
 _atom_type_description 
 _atom_type_scat_dispersion_real 
 _atom_type_scat_dispersion_imag 
 _atom_type_scat_source 
 'C'  'C'   0.0181   0.0091 
 'International Tables Vol C Tables 4.2.6.8 and 6.1.1.4' 
 'H'  'H'   0.0000   0.0000 
 'International Tables Vol C Tables 4.2.6.8 and 6.1.1.4' 
 'N'  'N'   0.0311   0.0180 
 'International Tables Vol C Tables 4.2.6.8 and 6.1.1.4' 
 'O'  'O'   0.0492   0.0322 
 'International Tables Vol C Tables 4.2.6.8 and 6.1.1.4' 
  
_symmetry_cell_setting            Orthorhombic 
_symmetry_space_group_name_H-M    P2(1)2(1)2(1) 
  
loop_ 
 _symmetry_equiv_pos_as_xyz 
 'x, y, z' 
 '-x+1/2, -y, z+1/2' 
 '-x, y+1/2, -z+1/2' 
 'x+1/2, -y+1/2, -z' 
  
_cell_length_a                    8.3572(3) 
_cell_length_b                    12.4724(4) 
_cell_length_c                    26.0754(8) 
_cell_angle_alpha                 90.00 
_cell_angle_beta                  90.00 
_cell_angle_gamma                 90.00 
_cell_volume                      2717.95(16) 
_cell_formula_units_Z             4 
_cell_measurement_temperature     100(2) 
_cell_measurement_reflns_used     9862 
_cell_measurement_theta_min       3.39 
_cell_measurement_theta_max       67.81 
  
_exptl_crystal_description        block 
_exptl_crystal_colour             colourless 
_exptl_crystal_size_max           0.25 
_exptl_crystal_size_mid           0.20 
_exptl_crystal_size_min           0.15 
_exptl_crystal_density_meas       ? 
_exptl_crystal_density_diffrn     1.223 
_exptl_crystal_density_method     'not measured' 
_exptl_crystal_F_000              1072 
_exptl_absorpt_coefficient_mu     0.643 
_exptl_absorpt_correction_type    multi-scan 
_exptl_absorpt_correction_T_min   0.8557 
_exptl_absorpt_correction_T_max   0.9096 
_exptl_absorpt_process_details    'SADABS (Sheldrick, 2009)' 
  
_exptl_special_details 
; 
 Bruker X8 Kappa DUO four-circle diffractometer, Bruker APEX2 CCD. 
 The instrument was purchased with the help of funding from the 
 National Science Foundation (NSF) under Grant Number 
 CHE-0946721.  Please acknowledge this grant in all publications 
 of this structure. 
; 
  
_diffrn_ambient_temperature       100(2) 
_diffrn_radiation_wavelength      1.54178 
_diffrn_radiation_type            CuK\a 
_diffrn_radiation_source          'fine-focus sealed tube' 
_diffrn_radiation_monochromator   graphite 
_diffrn_measurement_device_type   'Bruker Smart APEX2 CCD' 
_diffrn_measurement_method        '\f and \w scans' 
_diffrn_detector_area_resol_mean  8.3 
_diffrn_reflns_number             29588 
_diffrn_reflns_av_R_equivalents   0.0298 
_diffrn_reflns_av_sigmaI/netI     0.0180 
_diffrn_reflns_limit_h_min        -9 
_diffrn_reflns_limit_h_max        10 
_diffrn_reflns_limit_k_min        -14 
_diffrn_reflns_limit_k_max        14 
_diffrn_reflns_limit_l_min        -30 
_diffrn_reflns_limit_l_max        31 
_diffrn_reflns_theta_min          3.39 
_diffrn_reflns_theta_max          67.73 
_reflns_number_total              4852 
_reflns_number_gt                 4813 
_reflns_threshold_expression      >2sigma(I) 
  
_computing_data_collection        'APEX2 v2010.7.0 (Bruker-AXS, 2010)' 
_computing_cell_refinement        'SAINT 7.46A (Bruker-AXS, 2010)' 
_computing_data_reduction         'SAINT 7.46A (Bruker-AXS, 2010)' 
_computing_structure_solution     'SHELXS-97 (Sheldrick, 2008)' 
_computing_structure_refinement   'SHELXL-97 (Sheldrick, 2008)' 
_computing_molecular_graphics     'Bruker SHELXTL' 
_computing_publication_material   'Bruker SHELXTL' 
  
_refine_special_details 
; 
 Refinement of F^2^ against ALL reflections.  The weighted R-factor wR and 
 goodness of fit S are based on F^2^, conventional R-factors R are based 
 on F, with F set to zero for negative F^2^. The threshold expression of 
 F^2^ > 2sigma(F^2^) is used only for calculating R-factors(gt) etc. and is 
 not relevant to the choice of reflections for refinement.  R-factors based 
 on F^2^ are statistically about twice as large as those based on F, and R- 
 factors based on ALL data will be even larger. 
; 
  
_refine_ls_structure_factor_coef  Fsqd 
_refine_ls_matrix_type            full 
_refine_ls_weighting_scheme       calc 
_refine_ls_weighting_details 
 'calc w=1/[\s^2^(Fo^2^)+(0.0337P)^2^+0.5753P] where P=(Fo^2^+2Fc^2^)/3' 
_atom_sites_solution_primary      direct 
_atom_sites_solution_secondary    difmap 
_atom_sites_solution_hydrogens    geom 
_refine_ls_hydrogen_treatment     constr
_refine_ls_extinction_method      none 
_refine_ls_extinction_coef        ? 
_refine_ls_abs_structure_details 
 'Flack H D (1983), Acta Cryst. A39, 876-881' 
_refine_ls_abs_structure_Flack    -0.02(12) 
_refine_ls_number_reflns          4852 
_refine_ls_number_parameters      355 
_refine_ls_number_restraints      31 
_refine_ls_R_factor_all           0.0256 
_refine_ls_R_factor_gt            0.0254 
_refine_ls_wR_factor_ref          0.0657 
_refine_ls_wR_factor_gt           0.0653 
_refine_ls_goodness_of_fit_ref    1.037 
_refine_ls_restrained_S_all       1.047 
_refine_ls_shift/su_max           0.001 
_refine_ls_shift/su_mean          0.000 
  
loop_ 
 _atom_site_label 
 _atom_site_type_symbol 
 _atom_site_fract_x 
 _atom_site_fract_y 
 _atom_site_fract_z 
 _atom_site_U_iso_or_equiv 
 _atom_site_adp_type 
 _atom_site_occupancy 
 _atom_site_symmetry_multiplicity 
 _atom_site_calc_flag 
 _atom_site_refinement_flags 
 _atom_site_disorder_assembly 
 _atom_site_disorder_group 
O1 O 1.17478(10) -0.16189(6) 0.03694(3) 0.02052(18) Uani 1 1 d . . . 
O2 O 0.99060(11) 0.10772(7) 0.13925(3) 0.0255(2) Uani 1 1 d . . . 
O4 O 0.68819(11) -0.00157(7) -0.13621(3) 0.0274(2) Uani 1 1 d . . . 
N1 N 1.11170(11) -0.03432(7) 0.09731(3) 0.01639(19) Uani 1 1 d . . . 
N2 N 0.89799(11) 0.04169(7) 0.06206(3) 0.01613(19) Uani 1 1 d . . . 
C1 C 0.94577(13) -0.04145(9) 0.02571(4) 0.0153(2) Uani 1 1 d . . . 
C2 C 0.81482(14) -0.12869(9) 0.01506(4) 0.0170(2) Uani 1 1 d . . . 
H2 H 0.8721 -0.1980 0.0093 0.020 Uiso 1 1 calc R . . 
C3 C 0.74807(14) -0.09433(9) -0.03584(4) 0.0189(2) Uani 1 1 d . . . 
H3 H 0.6504 -0.1207 -0.0496 0.023 Uiso 1 1 calc R . . 
C4 C 0.84045(14) -0.02310(9) -0.05949(4) 0.0179(2) Uani 1 1 d . . . 
C5 C 0.98727(14) 0.00368(9) -0.02838(4) 0.0170(2) Uani 1 1 d . . . 
H5A H 1.0054 0.0821 -0.0271 0.020 Uiso 1 1 calc R . . 
H5B H 1.0836 -0.0316 -0.0427 0.020 Uiso 1 1 calc R . . 
C6 C 1.09177(13) -0.08909(9) 0.05260(4) 0.0156(2) Uani 1 1 d . . . 
C7 C 0.99565(14) 0.04661(9) 0.10317(4) 0.0175(2) Uani 1 1 d . . . 
C8 C 0.68985(14) -0.14871(9) 0.05683(4) 0.0191(2) Uani 1 1 d . . . 
H8A H 0.6384 -0.0795 0.0654 0.023 Uiso 1 1 calc R . . 
H8B H 0.6060 -0.1962 0.0426 0.023 Uiso 1 1 calc R . . 
C9 C 0.75202(14) -0.19865(9) 0.10638(4) 0.0190(2) Uani 1 1 d . . . 
H9 H 0.8312 -0.1486 0.1223 0.023 Uiso 1 1 calc R . . 
C10 C 0.61664(16) -0.21972(11) 0.14486(5) 0.0269(3) Uani 1 1 d . . . 
H10A H 0.5873 -0.1533 0.1634 0.032 Uiso 1 1 calc R . . 
H10B H 0.5205 -0.2483 0.1274 0.032 Uiso 1 1 calc R . . 
C11 C 0.68674(18) -0.30212(11) 0.18121(5) 0.0297(3) Uani 1 1 d . . . 
H11A H 0.6016 -0.3394 0.2006 0.036 Uiso 1 1 calc R . . 
H11B H 0.7621 -0.2684 0.2057 0.036 Uiso 1 1 calc R . . 
C12 C 0.77364(18) -0.37920(10) 0.14515(5) 0.0297(3) Uani 1 1 d . . . 
H12A H 0.7002 -0.4362 0.1331 0.036 Uiso 1 1 calc R . . 
H12B H 0.8656 -0.4131 0.1627 0.036 Uiso 1 1 calc R . . 
C13 C 0.83114(15) -0.31015(9) 0.09988(5) 0.0212(2) Uani 1 1 d . . . 
H13A H 0.7985 -0.3430 0.0669 0.025 Uiso 1 1 calc R . . 
H13B H 0.9492 -0.3035 0.1003 0.025 Uiso 1 1 calc R . . 
C14 C 0.80499(14) 0.02091(9) -0.11106(4) 0.0197(2) Uani 1 1 d . . . 
O3 O 0.91860(10) 0.09057(7) -0.12589(3) 0.02481(19) Uani 1 1 d D A . 
C15 C 0.89611(17) 0.14342(11) -0.17552(5) 0.0284(3) Uani 1 1 d DU . . 
H15A H 0.7804 0.1611 -0.1804 0.034 Uiso 0.861(4) 1 calc PR A 1 
H15B H 0.8162 0.1001 -0.1951 0.034 Uiso 0.139(4) 1 calc PR A 2 
C16 C 0.9504(3) 0.07175(16) -0.21756(6) 0.0405(5) Uani 0.861(4) 1 d PDU A 1 
H16A H 1.0635 0.0538 -0.2125 0.061 Uiso 0.861(4) 1 calc PR A 1 
H16B H 0.9371 0.1083 -0.2506 0.061 Uiso 0.861(4) 1 calc PR A 1 
H16C H 0.8865 0.0059 -0.2173 0.061 Uiso 0.861(4) 1 calc PR A 1 
C17 C 0.9935(2) 0.24743(14) -0.17189(7) 0.0386(5) Uani 0.861(4) 1 d PDU A 1 
H17A H 0.9572 0.2891 -0.1422 0.058 Uiso 0.861(4) 1 calc PR A 1 
H17B H 0.9783 0.2896 -0.2032 0.058 Uiso 0.861(4) 1 calc PR A 1 
H17C H 1.1072 0.2300 -0.1679 0.058 Uiso 0.861(4) 1 calc PR A 1 
C16A C 1.0536(15) 0.1320(14) -0.2025(5) 0.058(5) Uani 0.139(4) 1 d PDU A 2 
H16D H 1.0720 0.0563 -0.2108 0.087 Uiso 0.139(4) 1 calc PR A 2 
H16E H 1.1396 0.1578 -0.1801 0.087 Uiso 0.139(4) 1 calc PR A 2 
H16F H 1.0521 0.1743 -0.2342 0.087 Uiso 0.139(4) 1 calc PR A 2 
C17A C 0.8264(19) 0.2430(9) -0.1658(4) 0.053(4) Uani 0.139(4) 1 d PDU A 2 
H17D H 0.7223 0.2326 -0.1492 0.080 Uiso 0.139(4) 1 calc PR A 2 
H17E H 0.8118 0.2816 -0.1982 0.080 Uiso 0.139(4) 1 calc PR A 2 
H17F H 0.8962 0.2846 -0.1431 0.080 Uiso 0.139(4) 1 calc PR A 2 
C18 C 1.23709(14) -0.05432(9) 0.13532(4) 0.0197(2) Uani 1 1 d . . . 
H18A H 1.2797 0.0152 0.1475 0.024 Uiso 1 1 calc R . . 
H18B H 1.3259 -0.0938 0.1188 0.024 Uiso 1 1 calc R . . 
C19 C 1.17793(14) -0.11801(10) 0.18074(4) 0.0190(2) Uani 1 1 d . . . 
C20 C 1.11463(16) -0.06641(10) 0.22351(5) 0.0252(3) Uani 1 1 d . . . 
H20 H 1.1104 0.0097 0.2244 0.030 Uiso 1 1 calc R . . 
C21 C 1.05778(18) -0.12490(12) 0.26479(5) 0.0316(3) Uani 1 1 d . . . 
H21 H 1.0139 -0.0890 0.2937 0.038 Uiso 1 1 calc R . . 
C22 C 1.06510(17) -0.23618(12) 0.26385(5) 0.0324(3) Uani 1 1 d . . . 
H22 H 1.0267 -0.2766 0.2922 0.039 Uiso 1 1 calc R . . 
C23 C 1.12828(16) -0.28794(11) 0.22162(5) 0.0292(3) Uani 1 1 d . . . 
H23 H 1.1335 -0.3640 0.2210 0.035 Uiso 1 1 calc R . . 
C24 C 1.18400(15) -0.22963(10) 0.18014(5) 0.0227(2) Uani 1 1 d . . . 
H24 H 1.2266 -0.2659 0.1511 0.027 Uiso 1 1 calc R . . 
C25 C 0.76289(14) 0.11611(9) 0.05647(5) 0.0188(2) Uani 1 1 d . . . 
H25A H 0.7088 0.1230 0.0901 0.023 Uiso 1 1 calc R . . 
H25B H 0.6850 0.0846 0.0322 0.023 Uiso 1 1 calc R . . 
C26 C 0.80714(14) 0.22707(9) 0.03776(5) 0.0190(2) Uani 1 1 d . . . 
C27 C 0.86588(14) 0.30453(10) 0.07133(5) 0.0222(3) Uani 1 1 d . . . 
H27 H 0.8801 0.2875 0.1065 0.027 Uiso 1 1 calc R . . 
C28 C 0.90374(15) 0.40642(10) 0.05375(5) 0.0268(3) Uani 1 1 d . . . 
H28 H 0.9435 0.4588 0.0769 0.032 Uiso 1 1 calc R . . 
C29 C 0.88366(16) 0.43175(10) 0.00251(6) 0.0291(3) Uani 1 1 d . . . 
H29 H 0.9101 0.5014 -0.0095 0.035 Uiso 1 1 calc R . . 
C30 C 0.82518(17) 0.35564(10) -0.03114(5) 0.0286(3) Uani 1 1 d . . . 
H30 H 0.8113 0.3731 -0.0663 0.034 Uiso 1 1 calc R . . 
C31 C 0.78657(16) 0.25361(10) -0.01363(5) 0.0236(3) Uani 1 1 d . . . 
H31 H 0.7459 0.2017 -0.0369 0.028 Uiso 1 1 calc R . . 
  
loop_ 
 _atom_site_aniso_label 
 _atom_site_aniso_U_11 
 _atom_site_aniso_U_22 
 _atom_site_aniso_U_33 
 _atom_site_aniso_U_23 
 _atom_site_aniso_U_13 
 _atom_site_aniso_U_12 
O1 0.0224(4) 0.0183(4) 0.0209(4) -0.0002(3) 0.0012(3) 0.0048(3) 
O2 0.0378(5) 0.0206(4) 0.0181(4) -0.0060(3) -0.0045(4) 0.0054(4) 
O4 0.0290(5) 0.0329(5) 0.0204(4) 0.0028(4) -0.0079(4) -0.0041(4) 
N1 0.0190(5) 0.0155(4) 0.0147(4) 0.0018(4) -0.0013(4) 0.0017(4) 
N2 0.0186(5) 0.0132(4) 0.0166(4) -0.0011(4) -0.0008(4) 0.0025(4) 
C1 0.0178(5) 0.0133(5) 0.0149(5) -0.0008(4) 0.0009(4) 0.0004(4) 
C2 0.0199(6) 0.0129(5) 0.0181(5) -0.0014(4) -0.0012(5) -0.0009(5) 
C3 0.0205(5) 0.0170(5) 0.0193(6) -0.0036(4) -0.0031(5) -0.0002(5) 
C4 0.0203(6) 0.0164(5) 0.0169(5) -0.0017(4) 0.0003(4) 0.0012(5) 
C5 0.0191(5) 0.0165(5) 0.0155(5) 0.0011(4) -0.0007(4) -0.0005(4) 
C6 0.0189(5) 0.0129(5) 0.0149(5) 0.0031(4) 0.0025(4) -0.0017(4) 
C7 0.0221(6) 0.0152(5) 0.0151(5) 0.0021(4) 0.0007(4) -0.0010(5) 
C8 0.0184(6) 0.0166(5) 0.0223(6) 0.0002(4) 0.0013(5) -0.0017(5) 
C9 0.0210(6) 0.0173(5) 0.0187(5) 0.0000(4) 0.0029(5) -0.0008(5) 
C10 0.0270(6) 0.0295(7) 0.0241(6) 0.0035(5) 0.0073(5) 0.0048(6) 
C11 0.0326(7) 0.0335(7) 0.0231(6) 0.0058(5) 0.0056(5) -0.0006(6) 
C12 0.0404(8) 0.0230(6) 0.0256(6) 0.0065(5) 0.0033(6) 0.0016(6) 
C13 0.0234(6) 0.0191(6) 0.0213(5) 0.0004(5) 0.0015(5) 0.0027(5) 
C14 0.0213(6) 0.0205(6) 0.0173(5) -0.0020(4) -0.0010(5) 0.0021(5) 
O3 0.0240(4) 0.0321(5) 0.0184(4) 0.0085(4) -0.0018(3) -0.0022(4) 
C15 0.0298(7) 0.0357(7) 0.0196(6) 0.0112(5) -0.0020(5) 0.0000(6) 
C16 0.0548(12) 0.0457(11) 0.0210(8) 0.0084(7) 0.0035(8) 0.0037(9) 
C17 0.0467(11) 0.0382(10) 0.0310(9) 0.0143(7) -0.0024(8) -0.0083(8) 
C16A 0.053(8) 0.084(11) 0.038(7) 0.038(7) 0.009(6) 0.025(8) 
C17A 0.075(9) 0.051(7) 0.034(6) 0.019(5) 0.008(6) 0.027(7) 
C18 0.0190(5) 0.0221(6) 0.0179(5) 0.0026(5) -0.0035(5) -0.0007(5) 
C19 0.0179(5) 0.0224(6) 0.0168(5) 0.0029(5) -0.0048(5) -0.0015(5) 
C20 0.0318(7) 0.0230(6) 0.0209(6) 0.0006(5) -0.0012(5) -0.0001(5) 
C21 0.0377(7) 0.0388(7) 0.0182(6) 0.0002(5) 0.0029(5) -0.0020(6) 
C22 0.0361(7) 0.0384(7) 0.0226(6) 0.0132(6) -0.0023(6) -0.0075(6) 
C23 0.0316(7) 0.0237(6) 0.0324(7) 0.0097(5) -0.0043(6) -0.0018(6) 
C24 0.0219(6) 0.0241(6) 0.0223(6) 0.0010(5) -0.0031(5) 0.0023(5) 
C25 0.0174(5) 0.0166(5) 0.0225(6) -0.0008(5) -0.0004(5) 0.0024(5) 
C26 0.0157(5) 0.0160(5) 0.0253(6) -0.0002(5) 0.0015(5) 0.0046(5) 
C27 0.0200(6) 0.0198(6) 0.0269(6) 0.0001(5) -0.0020(5) 0.0031(5) 
C28 0.0189(6) 0.0175(6) 0.0441(7) -0.0028(5) -0.0006(6) 0.0018(5) 
C29 0.0205(6) 0.0178(6) 0.0490(8) 0.0099(6) 0.0102(6) 0.0057(5) 
C30 0.0294(7) 0.0281(7) 0.0283(6) 0.0104(5) 0.0071(6) 0.0125(6) 
C31 0.0256(7) 0.0207(6) 0.0247(6) -0.0005(5) -0.0004(5) 0.0076(5) 
  
_geom_special_details 
; 
 All esds (except the esd in the dihedral angle between two l.s. planes) 
 are estimated using the full covariance matrix.  The cell esds are taken 
 into account individually in the estimation of esds in distances, angles 
 and torsion angles; correlations between esds in cell parameters are only 
 used when they are defined by crystal symmetry.  An approximate (isotropic) 
 treatment of cell esds is used for estimating esds involving l.s. planes. 
; 
  
loop_ 
 _geom_bond_atom_site_label_1 
 _geom_bond_atom_site_label_2 
 _geom_bond_distance 
 _geom_bond_site_symmetry_2 
 _geom_bond_publ_flag 
O1 C6 1.2134(14) . ? 
O2 C7 1.2114(14) . ? 
O4 C14 1.2090(15) . ? 
N1 C6 1.3614(14) . ? 
N1 C7 1.4081(15) . ? 
N1 C18 1.4638(14) . ? 
N2 C7 1.3487(15) . ? 
N2 C1 1.4605(14) . ? 
N2 C25 1.4689(14) . ? 
C1 C6 1.5276(15) . ? 
C1 C5 1.5576(15) . ? 
C1 C2 1.5681(15) . ? 
C2 C3 1.5022(15) . ? 
C2 C8 1.5296(16) . ? 
C2 H2 1.0000 . ? 
C3 C4 1.3288(17) . ? 
C3 H3 0.9500 . ? 
C4 C14 1.4823(16) . ? 
C4 C5 1.5084(15) . ? 
C5 H5A 0.9900 . ? 
C5 H5B 0.9900 . ? 
C8 C9 1.5255(16) . ? 
C8 H8A 0.9900 . ? 
C8 H8B 0.9900 . ? 
C9 C10 1.5349(16) . ? 
C9 C13 1.5492(16) . ? 
C9 H9 1.0000 . ? 
C10 C11 1.5159(18) . ? 
C10 H10A 0.9900 . ? 
C10 H10B 0.9900 . ? 
C11 C12 1.5284(19) . ? 
C11 H11A 0.9900 . ? 
C11 H11B 0.9900 . ? 
C12 C13 1.5382(16) . ? 
C12 H12A 0.9900 . ? 
C12 H12B 0.9900 . ? 
C13 H13A 0.9900 . ? 
C13 H13B 0.9900 . ? 
C14 O3 1.3439(15) . ? 
O3 C15 1.4644(14) . ? 
C15 C17A 1.395(10) . ? 
C15 C16 1.485(2) . ? 
C15 C16A 1.499(10) . ? 
C15 C17 1.534(2) . ? 
C15 H15A 1.0000 . ? 
C15 H15B 1.0000 . ? 
C16 H16A 0.9800 . ? 
C16 H16B 0.9800 . ? 
C16 H16C 0.9800 . ? 
C17 H17A 0.9800 . ? 
C17 H17B 0.9800 . ? 
C17 H17C 0.9800 . ? 
C16A H16D 0.9800 . ? 
C16A H16E 0.9800 . ? 
C16A H16F 0.9800 . ? 
C17A H17D 0.9800 . ? 
C17A H17E 0.9800 . ? 
C17A H17F 0.9800 . ? 
C18 C19 1.5094(16) . ? 
C18 H18A 0.9900 . ? 
C18 H18B 0.9900 . ? 
C19 C20 1.3919(17) . ? 
C19 C24 1.3931(18) . ? 
C20 C21 1.3844(18) . ? 
C20 H20 0.9500 . ? 
C21 C22 1.390(2) . ? 
C21 H21 0.9500 . ? 
C22 C23 1.381(2) . ? 
C22 H22 0.9500 . ? 
C23 C24 1.3841(18) . ? 
C23 H23 0.9500 . ? 
C24 H24 0.9500 . ? 
C25 C26 1.5133(16) . ? 
C25 H25A 0.9900 . ? 
C25 H25B 0.9900 . ? 
C26 C31 1.3909(17) . ? 
C26 C27 1.3932(17) . ? 
C27 C28 1.3875(18) . ? 
C27 H27 0.9500 . ? 
C28 C29 1.383(2) . ? 
C28 H28 0.9500 . ? 
C29 C30 1.382(2) . ? 
C29 H29 0.9500 . ? 
C30 C31 1.3900(18) . ? 
C30 H30 0.9500 . ? 
C31 H31 0.9500 . ? 
  
loop_ 
 _geom_angle_atom_site_label_1 
 _geom_angle_atom_site_label_2 
 _geom_angle_atom_site_label_3 
 _geom_angle 
 _geom_angle_site_symmetry_1 
 _geom_angle_site_symmetry_3 
 _geom_angle_publ_flag 
C6 N1 C7 111.61(9) . . ? 
C6 N1 C18 125.58(9) . . ? 
C7 N1 C18 122.80(9) . . ? 
C7 N2 C1 112.50(9) . . ? 
C7 N2 C25 121.01(9) . . ? 
C1 N2 C25 126.47(9) . . ? 
N2 C1 C6 101.34(9) . . ? 
N2 C1 C5 113.07(9) . . ? 
C6 C1 C5 112.23(9) . . ? 
N2 C1 C2 114.63(9) . . ? 
C6 C1 C2 111.64(9) . . ? 
C5 C1 C2 104.23(8) . . ? 
C3 C2 C8 114.98(10) . . ? 
C3 C2 C1 102.57(9) . . ? 
C8 C2 C1 117.62(9) . . ? 
C3 C2 H2 107.0 . . ? 
C8 C2 H2 107.0 . . ? 
C1 C2 H2 107.0 . . ? 
C4 C3 C2 112.65(10) . . ? 
C4 C3 H3 123.7 . . ? 
C2 C3 H3 123.7 . . ? 
C3 C4 C14 123.53(11) . . ? 
C3 C4 C5 111.78(10) . . ? 
C14 C4 C5 124.65(10) . . ? 
C4 C5 C1 103.05(9) . . ? 
C4 C5 H5A 111.2 . . ? 
C1 C5 H5A 111.2 . . ? 
C4 C5 H5B 111.2 . . ? 
C1 C5 H5B 111.2 . . ? 
H5A C5 H5B 109.1 . . ? 
O1 C6 N1 126.41(11) . . ? 
O1 C6 C1 126.39(10) . . ? 
N1 C6 C1 107.20(9) . . ? 
O2 C7 N2 128.67(11) . . ? 
O2 C7 N1 124.00(10) . . ? 
N2 C7 N1 107.33(9) . . ? 
C9 C8 C2 115.93(10) . . ? 
C9 C8 H8A 108.3 . . ? 
C2 C8 H8A 108.3 . . ? 
C9 C8 H8B 108.3 . . ? 
C2 C8 H8B 108.3 . . ? 
H8A C8 H8B 107.4 . . ? 
C8 C9 C10 111.87(10) . . ? 
C8 C9 C13 114.78(9) . . ? 
C10 C9 C13 103.44(9) . . ? 
C8 C9 H9 108.8 . . ? 
C10 C9 H9 108.8 . . ? 
C13 C9 H9 108.8 . . ? 
C11 C10 C9 103.88(10) . . ? 
C11 C10 H10A 111.0 . . ? 
C9 C10 H10A 111.0 . . ? 
C11 C10 H10B 111.0 . . ? 
C9 C10 H10B 111.0 . . ? 
H10A C10 H10B 109.0 . . ? 
C10 C11 C12 103.03(10) . . ? 
C10 C11 H11A 111.2 . . ? 
C12 C11 H11A 111.2 . . ? 
C10 C11 H11B 111.2 . . ? 
C12 C11 H11B 111.2 . . ? 
H11A C11 H11B 109.1 . . ? 
C11 C12 C13 105.57(10) . . ? 
C11 C12 H12A 110.6 . . ? 
C13 C12 H12A 110.6 . . ? 
C11 C12 H12B 110.6 . . ? 
C13 C12 H12B 110.6 . . ? 
H12A C12 H12B 108.8 . . ? 
C12 C13 C9 106.57(10) . . ? 
C12 C13 H13A 110.4 . . ? 
C9 C13 H13A 110.4 . . ? 
C12 C13 H13B 110.4 . . ? 
C9 C13 H13B 110.4 . . ? 
H13A C13 H13B 108.6 . . ? 
O4 C14 O3 124.35(10) . . ? 
O4 C14 C4 124.59(11) . . ? 
O3 C14 C4 111.05(10) . . ? 
C14 O3 C15 117.04(9) . . ? 
C17A C15 O3 107.1(5) . . ? 
C17A C15 C16 142.9(5) . . ? 
O3 C15 C16 110.01(11) . . ? 
C17A C15 C16A 122.5(9) . . ? 
O3 C15 C16A 105.0(4) . . ? 
C16 C15 C16A 47.8(7) . . ? 
C17A C15 C17 57.2(7) . . ? 
O3 C15 C17 104.94(11) . . ? 
C16 C15 C17 113.10(14) . . ? 
C16A C15 C17 69.1(7) . . ? 
C17A C15 H15A 54.8 . . ? 
O3 C15 H15A 109.6 . . ? 
C16 C15 H15A 109.6 . . ? 
C16A C15 H15A 144.2 . . ? 
C17 C15 H15A 109.6 . . ? 
C17A C15 H15B 107.2 . . ? 
O3 C15 H15B 107.2 . . ? 
C16 C15 H15B 60.1 . . ? 
C16A C15 H15B 107.2 . . ? 
C17 C15 H15B 147.4 . . ? 
H15A C15 H15B 53.7 . . ? 
C15 C16 H16A 109.5 . . ? 
C15 C16 H16B 109.5 . . ? 
C15 C16 H16C 109.5 . . ? 
C15 C17 H17A 109.5 . . ? 
C15 C17 H17B 109.5 . . ? 
C15 C17 H17C 109.5 . . ? 
C15 C16A H16D 109.5 . . ? 
C15 C16A H16E 109.5 . . ? 
H16D C16A H16E 109.5 . . ? 
C15 C16A H16F 109.5 . . ? 
H16D C16A H16F 109.5 . . ? 
H16E C16A H16F 109.5 . . ? 
C15 C17A H17D 109.5 . . ? 
C15 C17A H17E 109.5 . . ? 
H17D C17A H17E 109.5 . . ? 
C15 C17A H17F 109.5 . . ? 
H17D C17A H17F 109.5 . . ? 
H17E C17A H17F 109.5 . . ? 
N1 C18 C19 112.73(10) . . ? 
N1 C18 H18A 109.0 . . ? 
C19 C18 H18A 109.0 . . ? 
N1 C18 H18B 109.0 . . ? 
C19 C18 H18B 109.0 . . ? 
H18A C18 H18B 107.8 . . ? 
C20 C19 C24 119.01(11) . . ? 
C20 C19 C18 120.65(11) . . ? 
C24 C19 C18 120.34(11) . . ? 
C21 C20 C19 120.65(12) . . ? 
C21 C20 H20 119.7 . . ? 
C19 C20 H20 119.7 . . ? 
C20 C21 C22 119.83(13) . . ? 
C20 C21 H21 120.1 . . ? 
C22 C21 H21 120.1 . . ? 
C23 C22 C21 119.84(12) . . ? 
C23 C22 H22 120.1 . . ? 
C21 C22 H22 120.1 . . ? 
C22 C23 C24 120.40(12) . . ? 
C22 C23 H23 119.8 . . ? 
C24 C23 H23 119.8 . . ? 
C23 C24 C19 120.26(12) . . ? 
C23 C24 H24 119.9 . . ? 
C19 C24 H24 119.9 . . ? 
N2 C25 C26 114.96(9) . . ? 
N2 C25 H25A 108.5 . . ? 
C26 C25 H25A 108.5 . . ? 
N2 C25 H25B 108.5 . . ? 
C26 C25 H25B 108.5 . . ? 
H25A C25 H25B 107.5 . . ? 
C31 C26 C27 118.94(11) . . ? 
C31 C26 C25 119.88(11) . . ? 
C27 C26 C25 121.17(11) . . ? 
C28 C27 C26 120.53(12) . . ? 
C28 C27 H27 119.7 . . ? 
C26 C27 H27 119.7 . . ? 
C29 C28 C27 120.04(12) . . ? 
C29 C28 H28 120.0 . . ? 
C27 C28 H28 120.0 . . ? 
C30 C29 C28 119.96(12) . . ? 
C30 C29 H29 120.0 . . ? 
C28 C29 H29 120.0 . . ? 
C29 C30 C31 120.16(12) . . ? 
C29 C30 H30 119.9 . . ? 
C31 C30 H30 119.9 . . ? 
C30 C31 C26 120.37(12) . . ? 
C30 C31 H31 119.8 . . ? 
C26 C31 H31 119.8 . . ? 
  
_diffrn_measured_fraction_theta_max    0.997 
_diffrn_reflns_theta_full              67.73 
_diffrn_measured_fraction_theta_full   0.997 
_refine_diff_density_max    0.188 
_refine_diff_density_min   -0.131 
_refine_diff_density_rms    0.030 
